# Supplementary material
Source: PubMed Central journal article supplement (PMC5821269)
Supplement: NIHMS928567-supplement-Supp_info.pdf [file NIHMS928567-supplement-Supp_info.pdf]

## Supporting Information

# A comparison of exogenous and endogenous CEST MRI methods for evaluating *in vivo* pH

Leila R. Lindeman,<sup>1</sup> Edward A. Randtke,<sup>2</sup> Rachel A. High,<sup>1</sup>  
Kyle M. Jones,<sup>3</sup> Christine M. Howison,<sup>2</sup> and Mark D. Pagel<sup>1,2,3,4</sup>

1. Cancer Biology Graduate Interdisciplinary Program, University of Arizona Cancer Center, Tucson, AZ, USA
2. Department of Medical Imaging, University of Arizona, Tucson, AZ, USA
3. Department of Biomedical Engineering, University of Arizona, Tucson, AZ, USA
4. Department of Cancer Systems Imaging, University of Texas MD Anderson Cancer Center, Houston, TX

\*Author to whom correspondence should be addressed

Mark D. Pagel, Ph.D.

Telephone: 713-205-8515

FAX: 713-745-7540

Email: mdpagel@mdanderson.org

## **Methods**

Supporting Table S1 lists the acquisition parameters for each MRI scan.

Supporting Table S1: Parameters for MRI scans, listed by murine model.

| Parameter                          | Kidney           | Flank Tumor     | Lung Tumor      |
|------------------------------------|------------------|-----------------|-----------------|
| <b>Anatomical Scans</b>            |                  |                 |                 |
| <i>Scan Type</i>                   | MSME             | RARE            | RARE            |
| <i>TR</i>                          | 1199 ms          | 1075.57 ms      | 1075.57 ms      |
| <i>TE</i>                          | 10.6 ms, 21.3 ms | 12.7            | 12.7 ms         |
| <i>Excitation flip angle</i>       | 180.0°           | 180.0°          | 180.0°          |
| <i>In-plane spatial resolution</i> | 0.0469 cm/pixel  | 0.0453 cm/pixel | 0.0453 cm/pixel |

|                                                                 |                                                                              |                                                                              |                                                                              |
|-----------------------------------------------------------------|------------------------------------------------------------------------------|------------------------------------------------------------------------------|------------------------------------------------------------------------------|
| <i>Matrix size</i>                                              | 128 × 128                                                                    | 128 × 128                                                                    | 128 × 128                                                                    |
| <i>FOV (cm)</i>                                                 | 6 × 4                                                                        | 5.8 × 5.8                                                                    | 5.8 × 5.8                                                                    |
| <i>Slice Thickness</i>                                          | 1 mm                                                                         | 1 mm                                                                         | 1 mm                                                                         |
| <i>Number of Slices</i>                                         | 10                                                                           | 6                                                                            | 6                                                                            |
| <i>RARE Factor</i>                                              | n/a                                                                          | 1                                                                            | 1                                                                            |
| <i>Number of averages</i>                                       | 1                                                                            | 1                                                                            | 1                                                                            |
| <i>Total acquisition time</i>                                   | 2:33 (minutes: seconds)                                                      | 2:17 (minutes: seconds)                                                      | 2:17 (minutes: seconds)                                                      |
| <b>acidoCEST MRI Scans</b>                                      |                                                                              |                                                                              |                                                                              |
| <i>Scan Type</i>                                                | CEST-FISP with respiration gating                                            | CEST-FISP with respiration gating                                            | CEST-FISP with respiration gating                                            |
| <i>TR</i>                                                       | 3.7 ms                                                                       | 3.7 ms                                                                       | 3.7 ms                                                                       |
| <i>TE</i>                                                       | 1.6 ms                                                                       | 1.6 ms                                                                       | 1.6 ms                                                                       |
| <i>Flip Angle</i>                                               | 15°                                                                          | 15°                                                                          | 15°                                                                          |
| <i>Spatial Resolution</i>                                       | 0.0453                                                                       | 0.0453                                                                       | 0.0453                                                                       |
| <i>Matrix Size</i>                                              | 128 × 128                                                                    | 128 × 128                                                                    | 128 × 128                                                                    |
| <i>FOV (cm)</i>                                                 | 5.8 × 5.8                                                                    | 5.8 × 5.8                                                                    | 5.8 × 5.8                                                                    |
| <i>Slice Thickness</i>                                          | 2 mm                                                                         | 2 mm                                                                         | 2 mm                                                                         |
| <i>Number of Slices</i>                                         | 1                                                                            | 1                                                                            | 1                                                                            |
| <i>Number of Averages</i>                                       | 1                                                                            | 1                                                                            | 1                                                                            |
| <i>Saturation Power</i>                                         | 3.5 $\mu$ T                                                                  | 3.5 $\mu$ T                                                                  | 3.5 $\mu$ T                                                                  |
| <i>Saturation Time</i>                                          | 600 ms                                                                       | 600 ms                                                                       | 600 ms                                                                       |
| <i>Number of Saturation Frequencies</i>                         | 40                                                                           | 40                                                                           | 40                                                                           |
| <i>Saturation Frequency range (increment), Hz</i>               | -3300 to -900 (600), -750 to 750 (150), 810 to 2700 (90), 3000 to 3300 (300) | -3300 to -900 (600), -750 to 750 (150), 810 to 2700 (90), 3000 to 3300 (300) | -3300 to -900 (600), -750 to 750 (150), 810 to 2700 (90), 3000 to 3300 (300) |
| <i>Number of CEST Spectra</i>                                   | 4 pre-injection, 6 post-injection                                            | 3 pre-injection, 5 post-injection                                            | 4 pre-injection, 6 post-injection                                            |
| <i>Acquisition time for one CEST spectrum (minutes:seconds)</i> | 4:14 (plus additional time caused by variable respiration)                   | 4:14 (plus additional time caused by variable respiration)                   | 4:14 (plus additional time caused by variable respiration)                   |
| <i>Total acquisition time (minutes:seconds)</i>                 | 42:22 (plus additional time caused by variable respiration)                  | 33:53 (plus additional time caused by variable respiration)                  | 42:22 (plus additional time caused by variable respiration)                  |

| <b>endogenous CEST MRI Scans</b>                                |                                                                |                                                                |                                                                |
|-----------------------------------------------------------------|----------------------------------------------------------------|----------------------------------------------------------------|----------------------------------------------------------------|
| <i>Scan Type</i>                                                | CEST-FISP with respiration gating                              | CEST-FISP with respiration gating                              | CEST-FISP with respiration gating                              |
| <i>TR</i>                                                       | 3.7 ms                                                         | 3.7 ms                                                         | 3.7 ms                                                         |
| <i>TE</i>                                                       | 1.6 ms                                                         | 1.6 ms                                                         | 1.6 ms                                                         |
| <i>Flip Angle</i>                                               | 6.3°                                                           | 6.3°                                                           | 6.3°                                                           |
| <i>Spatial Resolution</i>                                       | 0.0453                                                         | 0.0453                                                         | 0.0453                                                         |
| <i>Matrix Size</i>                                              | 128 × 128                                                      | 128                                                            | 128 × 128                                                      |
| <i>FOV (cm)</i>                                                 | 5.8 × 5.8                                                      | 5.8 × 5.8                                                      | 5.8 × 5.8                                                      |
| <i>Slice Thickness</i>                                          | 2 mm                                                           | 2 mm                                                           | 2 mm                                                           |
| <i>Number of Slices</i>                                         | 1                                                              | 1                                                              | 1                                                              |
| <i>Number of Averages</i>                                       | 1                                                              | 1                                                              | 1                                                              |
| <i>Saturation Power</i>                                         | 1.0, 1.5, 2.0 $\mu$ T                                          | 1.0, 1.5, 2.0 $\mu$ T                                          | 1.0, 1.5, 2.0 $\mu$ T                                          |
| <i>Saturation Time</i>                                          | 600 ms                                                         | 600 ms                                                         | 600 ms                                                         |
| <i>Saturation Frequencies</i>                                   | 750, 1050, 1350 Hz                                             | 750, 1050, 1350 Hz                                             | 750, 1050, 1350 Hz                                             |
| <i>Number of CEST Spectra</i>                                   | 9 (3 powers x 3 freq.)                                         | 9 (3 powers x 3 freq.)                                         | 9 (3 powers x 3 freq.)                                         |
| <i>Acquisition time for one CEST spectrum (minutes:seconds)</i> | 19.421 s (plus additional time caused by variable respiration) | 19.421 s (plus additional time caused by variable respiration) | 19.421 s (plus additional time caused by variable respiration) |
| <i>Total acquisition time (minutes:seconds)</i>                 | 2:55 (plus additional time caused by variable respiration)     | 2:55 (plus additional time caused by variable respiration)     | 2:55 (plus additional time caused by variable respiration)     |
